# Supplementary material
Source: MDPI journal article supplement (https://www.mdpi.com/2313-0105/8/12/292)
Supplement: s1 [file s1]

## SUPPLEMENTARY MATERIAL

### Molecular-dynamic simulations

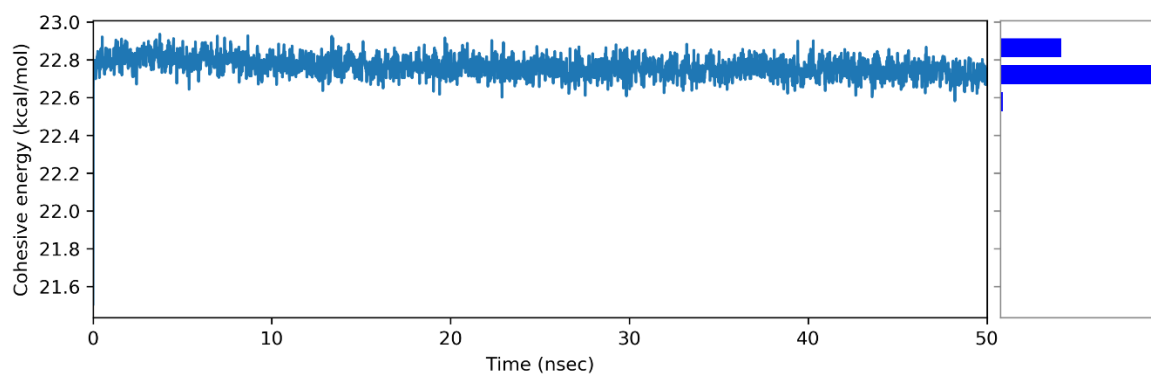

Figure S1. Fluctuations in cohesive energy of 1m LiBF<sub>4</sub> (EC/DMC)

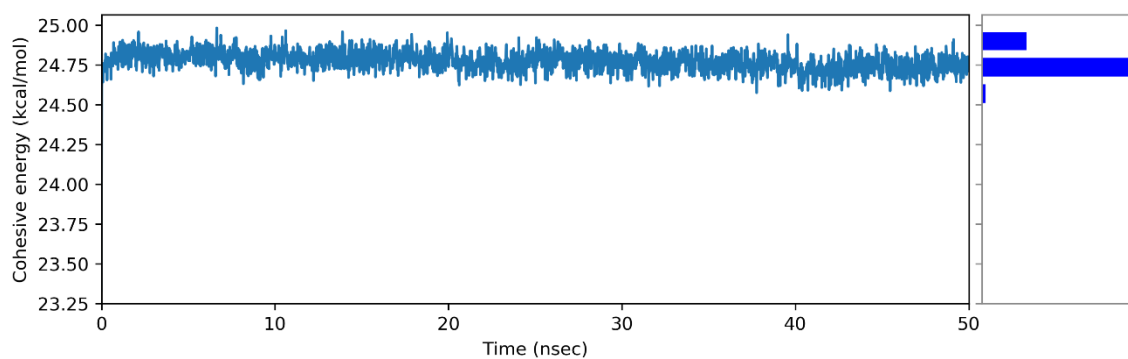

Figure S2. Fluctuations in cohesive energy of 1m LiBF<sub>4</sub> (SL/DMC)

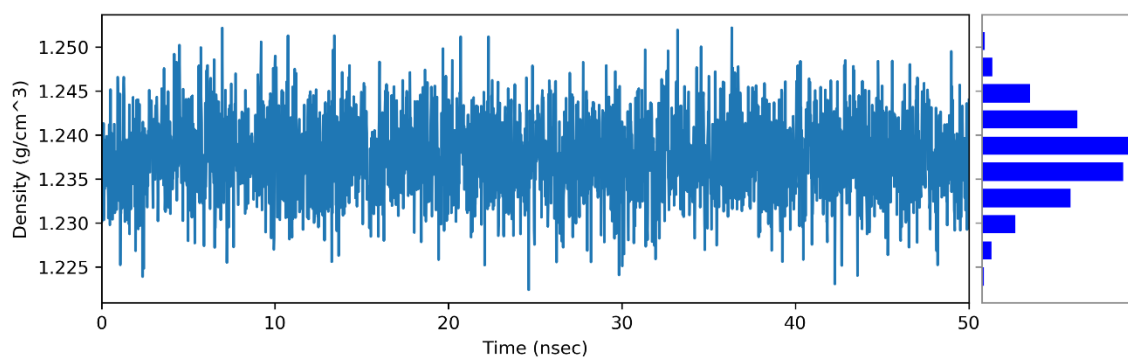

Figure S3. Fluctuation in density value of 1m LiBF<sub>4</sub> (EC/DMC)

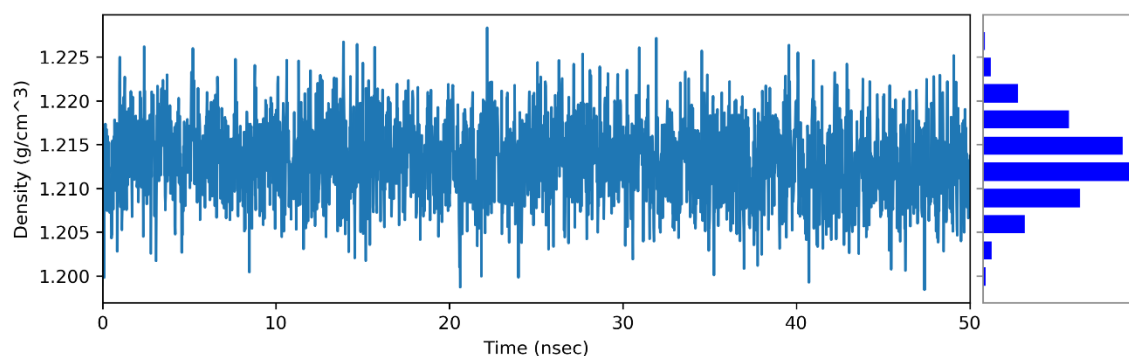

Figure S4. Fluctuation in density value of 1m LiBF<sub>4</sub> (SL/DMC)

## Quantum-chemical calculations

Table S1. Ionization potential (IP) and electron affinity (EA) values for the all systems, eV.

| ID                                                                | IP, eV | EA, eV |
|-------------------------------------------------------------------|--------|--------|
| <b>Solvent or associates</b>                                      |        |        |
| EC                                                                | 11.45  | -1.09  |
| SL                                                                | 10.06  | -1.92  |
| DMC - 1                                                           | 10.59  | -1.36  |
| DMC - 2                                                           | 10.39  | -1.23  |
| (DMC) <sub>2</sub>                                                | 9.91   | -0.97  |
| (EC) <sub>2</sub> -1                                              | 9.95   | -0.21  |
| (EC) <sub>2</sub> -2                                              | 8.86   | -0.38  |
| (SL) <sub>2</sub> -1                                              | 9.41   | 0.60   |
| (SL) <sub>2</sub> -2                                              | 9.40   | -1.19  |
| (EC) <sub>1</sub> (DMC) <sub>1</sub> -1                           | 10.19  | -0.94  |
| (EC) <sub>1</sub> (DMC) <sub>1</sub> -2                           | 10.18  | -0.93  |
| (SL) <sub>1</sub> (DMC) <sub>1</sub> -1                           | 9.64   | -0.71  |
| (SL) <sub>1</sub> (DMC) <sub>1</sub> -2                           | 9.75   | 0.17   |
| <b>Solvated anionic complexes</b>                                 |        |        |
| Non-solvent anion BF <sub>4</sub> <sup>-</sup>                    | 7.56   | -8.48  |
| BF <sub>4</sub> <sup>-</sup> (EC) <sub>1</sub>                    | 6.00   |        |
| BF <sub>4</sub> <sup>-</sup> (DMC) <sub>1</sub>                   | 5.57   |        |
| BF <sub>4</sub> <sup>-</sup> (SL) <sub>1</sub>                    | 6.76   |        |
| BF <sub>4</sub> <sup>-</sup> (EC) <sub>2</sub>                    | 6.07   |        |
| BF <sub>4</sub> <sup>-</sup> (DMC) <sub>2</sub>                   | 5.01   |        |
| BF <sub>4</sub> <sup>-</sup> (SL) <sub>2</sub>                    | 6.41   |        |
| BF <sub>4</sub> <sup>-</sup> (EC) <sub>1</sub> (DMC) <sub>1</sub> | 5.27   |        |

|                                                            |       |       |
|------------------------------------------------------------|-------|-------|
| $\text{BF}_4^- (\text{SL})_1 (\text{DMC})_1$               | 6.55  | -2.88 |
| Solvated cationic complexes                                |       |       |
| $\text{Li}^+ (\text{EC})_1$                                |       | 3.55  |
| $\text{Li}^+ (\text{EC})_2$                                |       | 2.12  |
| $\text{Li}^+ (\text{EC})_3$                                |       | 3.15  |
| $\text{Li}^+ (\text{EC})_4$                                |       | 3.11  |
| $\text{Li}^+ (\text{DMC})_1$                               |       | 3.89  |
| $\text{Li}^+ (\text{DMC})_2$                               |       | 2.75  |
| $\text{Li}^+ (\text{DMC})_3$                               |       | 2.29  |
| $\text{Li}^+ (\text{DMC})_4$                               |       | 2.98  |
| $\text{Li}^+ (\text{SL})_1$                                |       | 3.48  |
| $\text{Li}^+ (\text{SL})_2$                                |       | 4.72  |
| $\text{Li}^+ (\text{SL})_3$                                |       | 1.38  |
| $\text{Li}^+ (\text{SL})_4$                                |       | 3.69  |
| $\text{Li}^+ (\text{EC})_3 (\text{DMC})_1$                 |       | 3.05  |
| $\text{Li}^+ (\text{EC})_2 (\text{DMC})_2$                 |       | 3.14  |
| $\text{Li}^+ (\text{EC})_1 (\text{DMC})_3$                 |       | 3.24  |
| $\text{Li}^+ (\text{SL})_3 (\text{DMC})_1$                 |       | 2.47  |
| $\text{Li}^+ (\text{SL})_2 (\text{DMC})_2$                 |       | 2.68  |
| $\text{Li}^+ (\text{SL})_1 (\text{DMC})_3$                 |       | 2.74  |
| $\text{Li}^+ (\text{EC})_1 (\text{DMC})_1$                 |       | 3.30  |
| $\text{Li}^+ (\text{EC})_2 (\text{DMC})_1$                 |       | 3.36  |
| $\text{Li}^+ (\text{EC})_1 (\text{DMC})_2$                 |       | 3.23  |
| $\text{Li}^+ (\text{SL})_1 (\text{DMC})_1$                 |       | 2.56  |
| $\text{Li}^+ (\text{SL})_2 (\text{DMC})_1$                 |       | 2.83  |
| $\text{Li}^+ (\text{SL})_1 (\text{DMC})_2$                 |       | 3.09  |
| Solvated ionic pairs                                       |       |       |
| Non-solvent ion-pair $\{\text{Li}^+ \text{BF}_4\}$         | 12.87 | 0.35  |
| $\{\text{Li}^+ \text{BF}_4\} (\text{EC})_1$                | 11.99 | 0.64  |
| $\{\text{Li}^+ \text{BF}_4\} (\text{DMC})_1$               | 10.00 | -0.56 |
| $\{\text{Li}^+ \text{BF}_4\} (\text{EC})_2$                | 9.31  | 0.14  |
| $\{\text{Li}^+ \text{BF}_4\} (\text{DMC})_2$               | 9.68  | -0.01 |
| $\{\text{Li}^+ \text{BF}_4\} (\text{EC})_1 (\text{DMC})_1$ | 9.49  | -1.05 |
| $\{\text{Li}^+ \text{BF}_4\} (\text{SL})_1$                | 10.61 | -0.47 |
| $\{\text{Li}^+ \text{BF}_4\} (\text{SL})_2$                | 9.86  | 0.29  |
| $\{\text{Li}^+ \text{BF}_4\} (\text{SL})_1 (\text{DMC})_1$ | 10.21 | 1.16  |

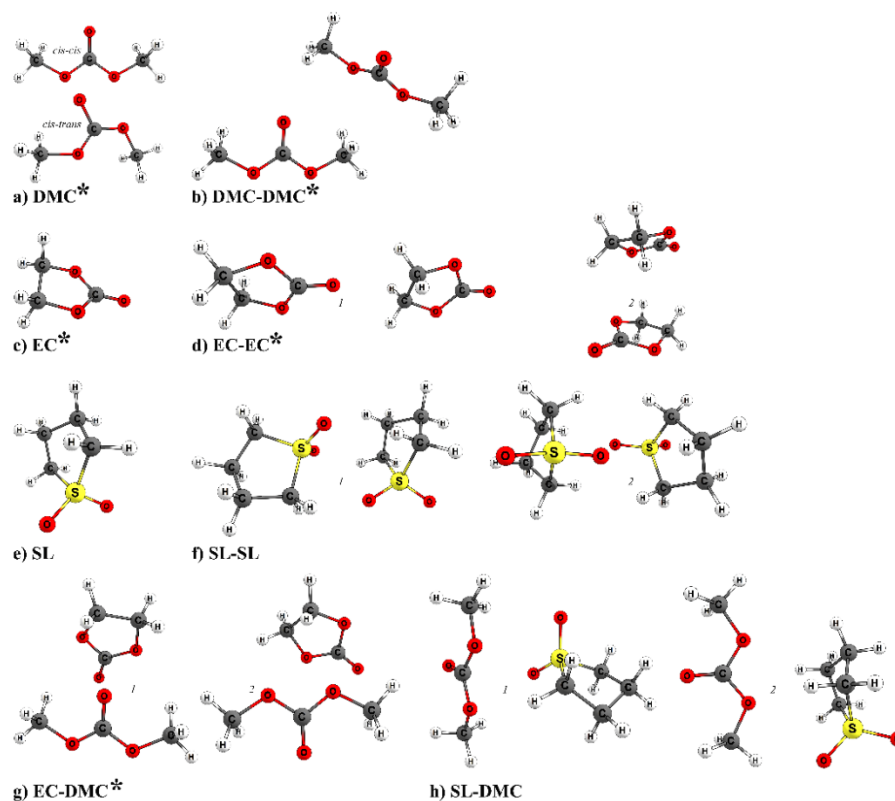

Figure S5. Geometric structure of EC, DMC, SL solvents and their associates

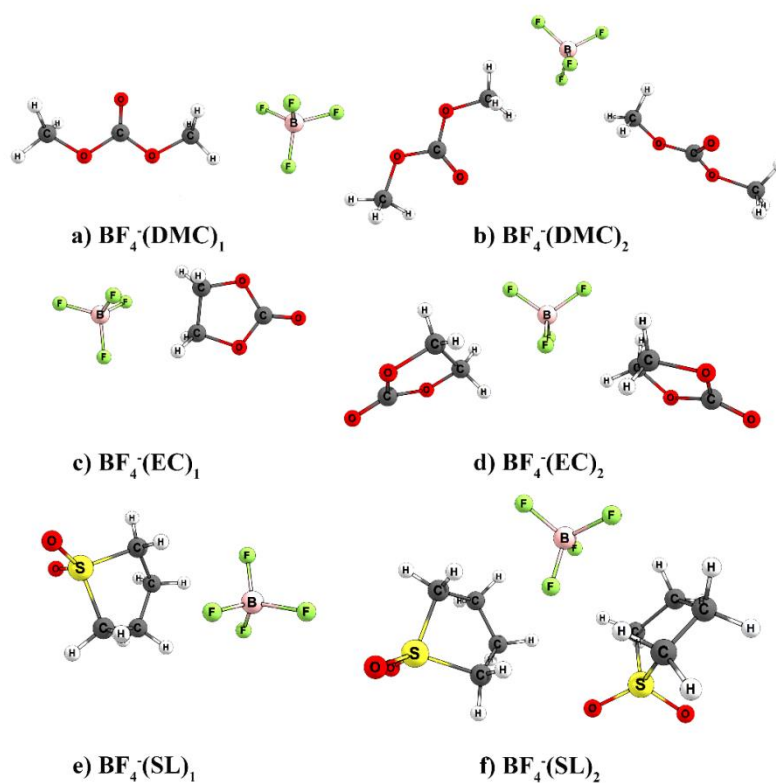

Figure S6. Geometric structure of anionic complexes of the type  $\text{BF}_4^-(\text{X})_n$ , where  $\text{X}=\text{EC}$ ,  $\text{DMC}$ ,  $\text{SL}$ .

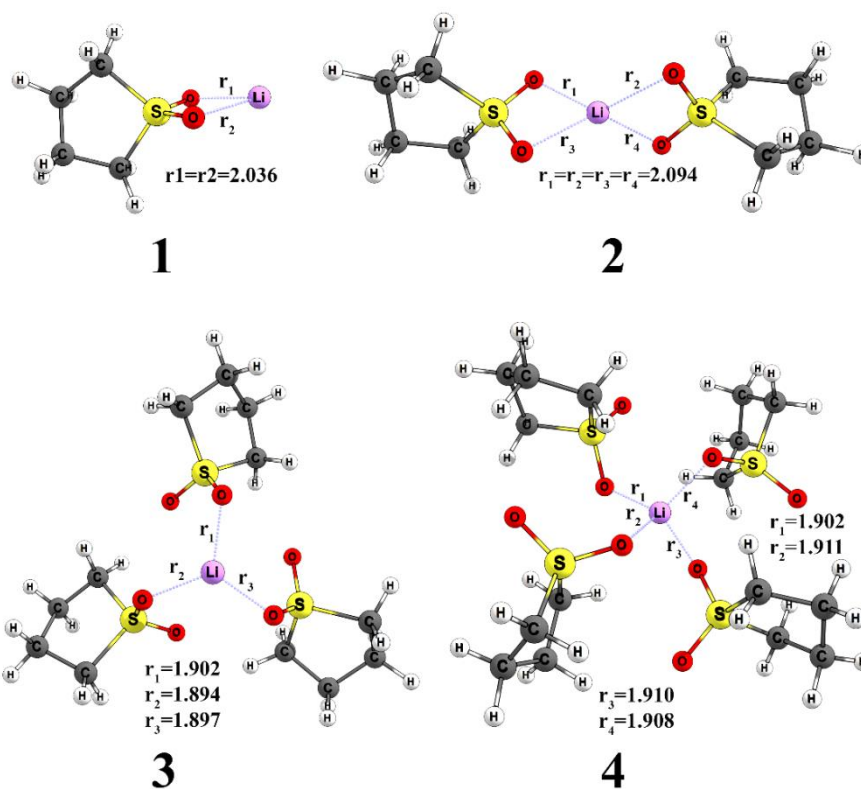

Figure S7. Geometric structure of complexes of the type  $\text{Li}^+\text{SL}_n$

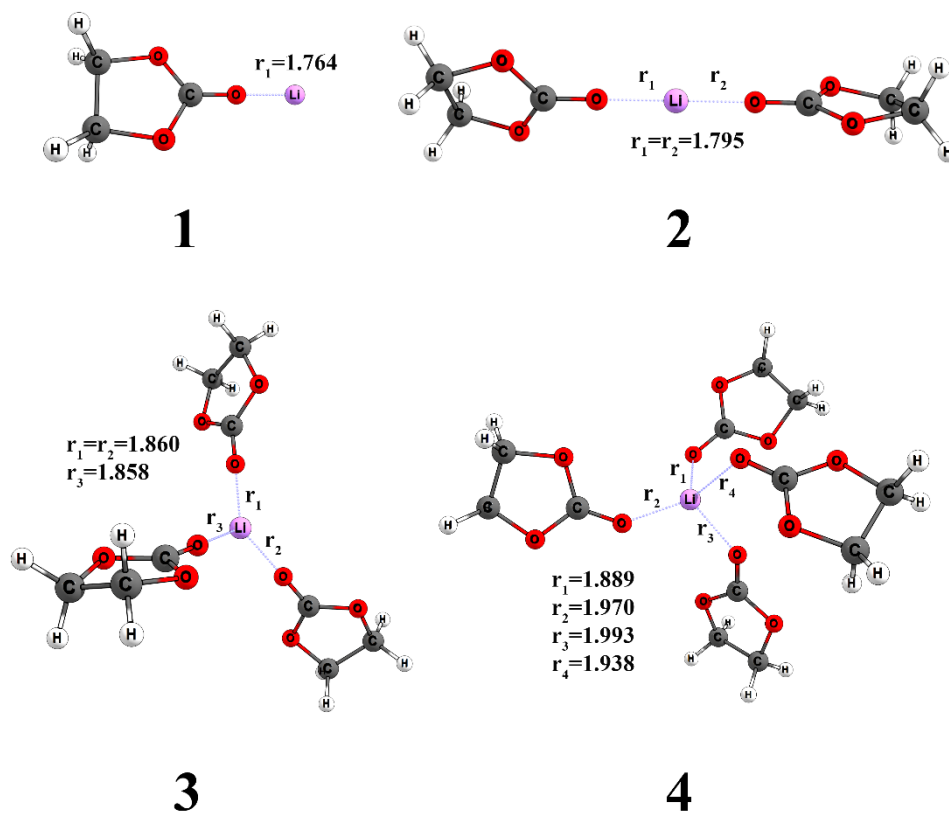

Figure S8. Geometric structure of complexes of the type  $\text{Li}^+\text{EC}_n$

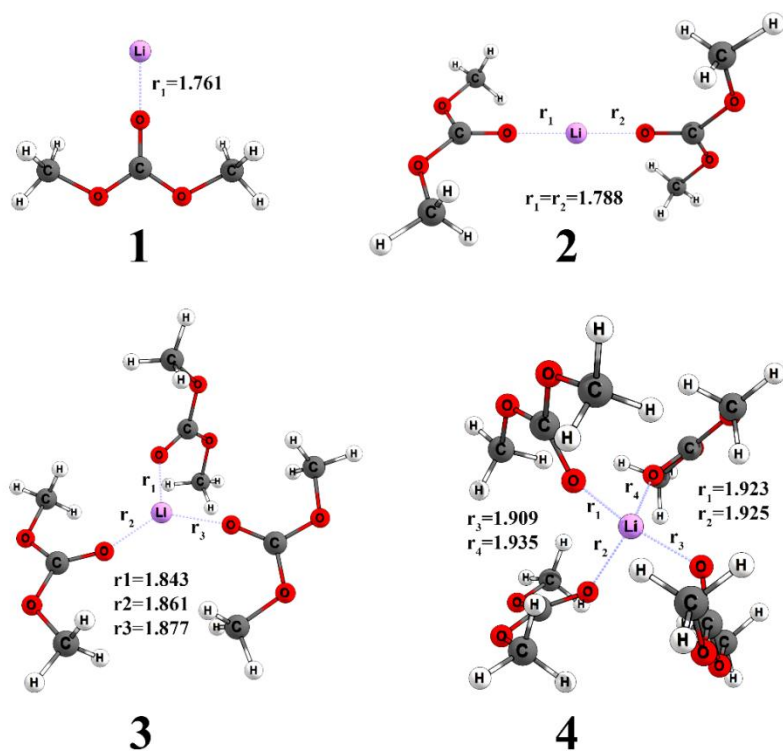

Figure S9. Geometric structure of complexes of the type  $\text{Li}^+\text{DMC}_n$

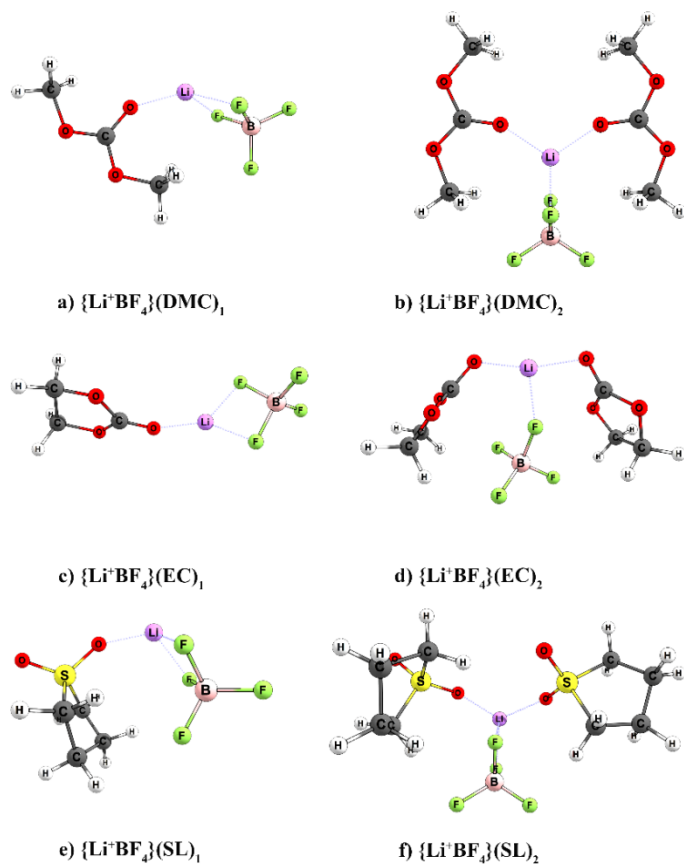

Figure S10. Geometric structure of complexes of the type  $\{\text{Li}^+\text{BF}_4\}(\text{X})_n$ , where  $\text{X}=\text{EC}$ ,  $\text{DMC}$ ,  $\text{SL}$ .

## NMR data

### System LiBF<sub>4</sub>/EC/DMC

<sup>1</sup>H (δ ppm): 4.33 (4H, s., -CH<sub>2</sub>- EC), 3.51 (6H, s., CH<sub>3</sub>- DMC)

<sup>7</sup>Li (δ ppm): -6.68 (s., LiBF<sub>4</sub>)

<sup>11</sup>B (δ ppm): -7.25 (s., LiBF<sub>4</sub>)

<sup>13</sup>C (δ ppm): 151.10 (1C, s., C=O- EC), 150.82 (1C, s., C=O- DMC), 59.67 (2C, s., CH<sub>2</sub>-O- EC), 48.69 (2C, s., CH<sub>3</sub>-O- DMC)

<sup>17</sup>O (δ ppm): 225.5 (1O, br.s., C=O), 201.6 (1O, w.s., C=O), 103.8 (2O, br.s., O-CH<sub>2</sub>- EC), 84.5 (2O, w.s., O-CH<sub>3</sub>- DMC)

<sup>19</sup>F (δ ppm): -162.04 (s., Li<sup>10</sup>BF<sub>4</sub>), -162.09 (s., Li<sup>11</sup>BF<sub>4</sub>)

### System LiBF<sub>4</sub>/SL/ DMC

<sup>1</sup>H (δ ppm): 3.48 (6H, s., CH<sub>3</sub>- DMC), 2.78 (4H, m. -CH<sub>2</sub>-S SL), 1.93 (m. -CH<sub>2</sub> - SL),

<sup>7</sup>Li (δ ppm): -0.11 (s., LiBF<sub>4</sub>)

<sup>11</sup>B (δ ppm): -1.58 (s., LiBF<sub>4</sub>)

<sup>13</sup>C (δ ppm): 156.96 (1C, s., DMC), 55.04 (2C, s., CH<sub>2</sub>-S- SL), 51.22 (2C, s., CH<sub>3</sub>-O- DMC), 22.75 (2C, s., CH<sub>2</sub>- SL)

<sup>17</sup>O (δ ppm): 233.4 (br.s.), 159.3 (w.s.), 90.8 (br.s.)

<sup>19</sup>F (δ ppm): -155.21 (s., Li<sup>10</sup>BF<sub>4</sub>), -155.26 (s., Li<sup>11</sup>BF<sub>4</sub>)
